# Supplementary material for: Viroscope™: a universal solution for plant virus and viroid diagnostics using HTS and cloud-based analysis
Source: Front Microbiol. 2025 Jul 3;16:1609663. doi: 10.3389/fmicb.2025.1609663 (PMC12267180; doi:10.3389/fmicb.2025.1609663)
Supplement: Supplementary Table S2 — Primer list used in qPCR methods for sensitivity analysis validation. [file Table_2.xlsx]

## Sheet: Sheet1
			Virus																Viroid
Sample	Plant	Scientific name	ASGV	ASPV	CCGaV	CNRMV	CTLV	CVA	LChV-1	OLYaV	OL-sat-RNA	PaEV1	PBNSPaV	PDV	PNRSV	PVF	PVT	TiRSaV	AHVd	ASBVd
11337	Apple	Malus domestica	0.16	0.16	0	0	0.02	0	0	0	0	0	0	0	0	0	0	0	0.88	0
11336	Apple	Malus domestica	0.13	0.01	0	0	0	0	0	0	0	0	0	0	0	0	0	0	0.56	0
11335	Apple	Malus domestica	0	0.02	0	0	0.04	0	0	0	0	0	0	0	0	0	0	0	0	0
11338	Apple	Malus domestica	0	0	0.76	0	0	0	0	0	0	0	0	0	0	0	0	0	0	0
11339	Apple	Malus domestica	0	0	0	0	0	0	0	0	0	0	0	0	0	0	0	0	0	0
11341	Apple	Malus domestica	0	0	0	0	0	0	0	0	0	0	0	0	0	0	0	0	0	0
11342	Apple	Malus domestica	0	0	0	0	0	0	0	0	0	0	0	0	0	0	0	0	0	0
11343	Apple	Malus domestica	0	0	0	0	0	0	0	0	0	0	0	0	0	0	0	0	0	0
29408	Apple	Malus domestica	0	0	0	0	0	0	0	0	0	0	0	0	0	0	0	0	0	0
29409	Apple	Malus domestica	0	0	0	0	0	0	0	0	0	0	0	0	0	0	0	0	0	0
29410	Apple	Malus domestica	0	0	0	0	0	0	0	0	0	0	0	0	0	0	0	0	0	0
29411	Apple	Malus domestica	0	0	0	0	0	0	0	0	0	0	0	0	0	0	0	0	0	0
29412	Apple	Malus domestica	0	0	0	0	0	0	0	0	0	0	0	0	0	0	0	0	0	0
29413	Apple	Malus domestica	0	0	0	0	0	0	0	0	0	0	0	0	0	0	0	0	0	0
29414	Apple	Malus domestica	0	0	0	0	0	0	0	0	0	0	0	0	0	0	0	0	0	0
29415	Apple	Malus domestica	0	0	0	0	0	0	0	0	0	0	0	0	0	0	0	0	0	0
29416	Apple	Malus domestica	0	0	0	0	0	0	0	0	0	0	0	0	0	0	0	0	0	0
29417	Apple	Malus domestica	0	0	0	0	0	0	0	0	0	0	0	0	0	0	0	0	0	0
29418	Apple	Malus domestica	0	0	0	0	0	0	0	0	0	0	0	0	0	0	0	0	0	0
29419	Apple	Malus domestica	0	0	0	0	0	0	0	0	0	0	0	0	0	0	0	0	0	0
29421	Apple	Malus domestica	0	0	0	0	0	0	0	0	0	0	0	0	0	0	0	0	0	0
29422	Apple	Malus domestica	0	0	0	0	0	0	0	0	0	0	0	0	0	0	0	0	0	0
29423	Apple	Malus domestica	0	0	0	0	0	0	0	0	0	0	0	0	0	0	0	0	0	0
29424	Apple	Malus domestica	0	0	0	0	0	0	0	0	0	0	0	0	0	0	0	0	0	0
47554	Avocado	Persea americana	0	0	0	0	0	0	0	0	0	0.99	0	0	0	0	0	0	0	0
47555	Avocado	Persea americana	0	0	0	0	0	0	0	0	0	0.99	0	0	0	0	0	0	0	0
47560	Avocado	Persea americana	0	0	0	0	0	0	0	0	0	0.99	0	0	0	0	0	0	0	0
47561	Avocado	Persea americana	0	0	0	0	0	0	0	0	0	0.99	0	0	0	0	0	0	0	0
47568	Avocado	Persea americana	0	0	0	0	0	0	0	0	0	0.99	0	0	0	0	0	0	0	0
47569	Avocado	Persea americana	0	0	0	0	0	0	0	0	0	0	0	0	0	0	0	0	0	0
47573	Avocado	Persea americana	0	0	0	0	0	0	0	0	0	0	0	0	0	0	0	0	0	0
47583	Avocado	Persea americana	0	0	0	0	0	0	0	0	0	0	0	0	0	0	0	0	0	0
47584	Avocado	Persea americana	0	0	0	0	0	0	0	0	0	0	0	0	0	0	0	0	0	0
48040	Avocado	Persea americana	0	0	0	0	0	0	0	0	0	0	0	0	0	0	0	0	0	0
48050	Avocado	Persea americana	0	0	0	0	0	0	0	0	0	0	0	0	0	0	0	0	0	0
48058	Avocado	Persea americana	0	0	0	0	0	0	0	0	0	1	0	0	0	0	0	0	0	0
48059	Avocado	Persea americana	0	0	0	0	0	0	0	0	0	0.99	0	0	0	0	0	0	0	0
48073	Avocado	Persea americana	0	0	0	0	0	0	0	0	0	0	0	0	0	0	0	0	0	0
48074	Avocado	Persea americana	0	0	0	0	0	0	0	0	0	0	0	0	0	0	0	0	0	0
48082	Avocado	Persea americana	0	0	0	0	0	0	0	0	0	0	0	0	0	0	0	0	0	0
48083	Avocado	Persea americana	0	0	0	0	0	0	0	0	0	0	0	0	0	0	0	0	0	0
48093	Avocado	Persea americana	0	0	0	0	0	0	0	0	0	0	0	0	0	0	0	0	0	0
48094	Avocado	Persea americana	0	0	0	0	0	0	0	0	0	0	0	0	0	0	0	0	0	0
48096	Avocado	Persea americana	0	0	0	0	0	0	0	0	0	0	0	0	0	0	0	0	0	0
48100	Avocado	Persea americana	0	0	0	0	0	0	0	0	0	0	0	0	0	0	0	0	0	0
48115	Avocado	Persea americana	0	0	0	0	0	0	0	0	0	0	0	0	0	0	0	0	0	0
48117	Avocado	Persea americana	0	0	0	0	0	0	0	0	0	0	0	0	0	0	0	0	0	0
48118	Avocado	Persea americana	0	0	0	0	0	0	0	0	0	0	0	0	0	0	0	0	0	0
48162	Avocado	Persea americana	0	0	0	0	0	0	0	0	0	0.99	0	0	0	0	0	0	0	0
48167	Avocado	Persea americana	0	0	0	0	0	0	0	0	0	0.99	0	0	0	0	0	0	0	0
48168	Avocado	Persea americana	0	0	0	0	0	0	0	0	0	0.99	0	0	0	0	0	0	0	0
11156	Citrus	Citrus reticulata	0	0	0	0	0	0	0	0	0	0	0	0	0	0	0	0	0	0
11157	Citrus	Citrus reticulata	0	0	0	0	0	0	0	0	0	0	0	0	0	0	0	0	0	0
11158	Citrus	Citrus reticulata	0	0	0	0	0	0	0	0	0	0	0	0	0	0	0	0	0	0
29450	Japanese plum	Prunus salicina	0	0	0	0	0	0	0	0	0	0	0	0	0	0	0	0	0	0
29452	Japanese plum	Prunus salicina	0	0	0	0	0	0	0	0	0	0	0	0	0	0	0	0	0	0
29455	Japanese plum	Prunus salicina	0	0	0	0	0	0	0	0	0	0	0	0	0	0	0	0	0	0
29457	Japanese plum	Prunus salicina	0	0	0	0	0	0	0	0	0	0	0	0	0	0	0	0	0	0
29460	Japanese plum	Prunus salicina	0	0	0	0	0	0	0	0	0	0	0	0	0	0	0	0	0	0
29461	Japanese plum	Prunus salicina	0	0	0	0	0	0	0	0	0	0	0	0	0	0	0	0	0	0
29462	Japanese plum	Prunus salicina	0	0	0	0	0	0	0	0	0	0	0	0	0	0	0	0	0	0
29463	Japanese plum	Prunus salicina	0	0	0	0	0	0	0	0	0	0	0	0	0	0	0	0	0	0
29467	Japanese plum	Prunus salicina	0	0	0	0	0	0	0	0	0	0	0	0	0	0	0	0	0	0
29468	Japanese plum	Prunus salicina	0	0	0	0	0	0	0	0	0	0	0	0	0	0	0	0	0	0
29469	Japanese plum	Prunus salicina	0	0	0	0	0	0	0	0	0	0	0	0	0	0	0	0	0	0
29470	Japanese plum	Prunus salicina	0	0	0	0	0	0	0	0	0	0	0	0	0	0	0	0	0	0
29473	Japanese plum	Prunus salicina	0	0	0	0	0	0	0	0	0	0	0	0	0	0	0	0	0	0
29474	Japanese plum	Prunus salicina	0	0	0	0	0	0	0	0	0	0	0	0	0	0	0	0	0	0
29475	Japanese plum	Prunus salicina	0	0	0	0	0	0	0	0	0	0	0	0	0	0	0	0	0	0
29476	Japanese plum	Prunus salicina	0	0	0	0	0	0	0	0	0	0	0	0	0	0	0	0	0	0
29477	Japanese plum	Prunus salicina	0	0	0	0	0	0	0	0	0	0	0	0	0	0	0	0	0	0
29479	Japanese plum	Prunus salicina	0	0	0	0	0	0	0	0	0	0	0	0	0	0	0	0	0	0
21173-1	Olive	Olea europaea	0	0	0	0	0	0	0	0	0	0	0	0	0	0	0	0	0	0
21173-2	Olive	Olea europaea	0	0	0	0	0	0	0	0	0	0	0	0	0	0	0	0	0	0
21173-3	Olive	Olea europaea	0	0	0	0	0	0	0	0	0	0	0	0	0	0	0	0	0	0
21174-1	Olive	Olea europaea	0	0	0	0	0	0	0	0.57	0	0	0	0	0	0	0	0	0	0
21174-2	Olive	Olea europaea	0	0	0	0	0	0	0	0.51	0	0	0	0	0	0	0	0	0	0
21174-3	Olive	Olea europaea	0	0	0	0	0	0	0	0.09	0	0	0	0	0	0	0	0	0	0
21178-1	Olive	Olea europaea	0	0	0	0	0	0	0	0.38	0.84	0	0	0	0	0	0	0	0	0
21178-2	Olive	Olea europaea	0	0	0	0	0	0	0	0.33	0	0	0	0	0	0	0	0	0	0
21179-1	Olive	Olea europaea	0	0	0	0	0	0	0	0	0	0	0	0	0	0	0	0	0	0
21179-2	Olive	Olea europaea	0	0	0	0	0	0	0	0	0	0	0	0	0	0	0	0	0	0
21180-1	Olive	Olea europaea	0	0	0	0	0	0	0	0	0	0	0	0	0	0	0	0	0	0
21181-1	Olive	Olea europaea	0	0	0	0	0	0	0	0.18	0	0	0	0	0	0	0	0	0	0
21181-2	Olive	Olea europaea	0	0	0	0	0	0	0	0.01	0	0	0	0	0	0	0	0	0	0
21182-1	Olive	Olea europaea	0	0	0	0	0	0	0	0	0	0	0	0	0	0	0	0	0	0
21182-2	Olive	Olea europaea	0	0	0	0	0	0	0	0	0	0	0	0	0	0	0.04	0	0	0
21183-1	Olive	Olea europaea	0	0	0	0	0	0	0	0.04	0	0	0	0	0	0	0	0	0	0
21183-2	Olive	Olea europaea	0	0	0	0	0	0	0	0	0	0	0	0	0	0	0	0	0	0
21183-3	Olive	Olea europaea	0	0	0	0	0	0	0	0.03	0.24	0	0	0	0	0	0	0	0	0
72784-1	Olive	Olea europaea	0	0	0	0	0	0	0	0.78	0	0	0	0	0	0	0	0	0	0
72784-2	Olive	Olea europaea	0	0	0	0	0	0	0	0.54	0	0	0	0	0	0	0	0	0	0
11301	Plum	Prunus domestica	0	0	0	0	0	0	0	0	0	0	0	0	0	0	0	0	0	0
11303	Plum	Prunus domestica	0	0	0	0	0	0	0	0	0	0	0	0	0	0	0	0	0	0
11305	Plum	Prunus domestica	0	0	0	0	0	0	0	0	0	0	0	0	0	0	0	0	0	0
11306	Plum	Prunus domestica	0	0	0	0	0	0	0	0	0	0	0	0	0	0	0	0	0	0
11307	Plum	Prunus domestica	0	0	0	0	0	0	0	0	0	0	0	0	0	0	0	0	0	0
11308	Plum	Prunus domestica	0	0	0	0	0	0	0	0	0	0	0.05	0	0	0	0	0	0	0
11309	Plum	Prunus domestica	0	0	0	0	0	0	0	0	0	0	0	0	0	0	0	0	0	0
11310	Plum	Prunus domestica	0	0	0	0	0	0	0	0	0	0	0.68	0	0	0	0	0	0	0
11311	Plum	Prunus domestica	0	0	0	0	0	0	0	0	0	0	0	0	0	0	0	0	0	0
11312	Plum	Prunus domestica	0	0	0	0	0	0	0	0	0	0	0.81	0	0	0	0	0	0	0
11313	Plum	Prunus domestica	0	0	0	0	0	0	0	0	0	0	0.6	0	0	0	0	0	0	0
11314	Plum	Prunus domestica	0	0	0	0	0	0	0	0	0	0	0.25	0	0	0	0	0	0	0
11315	Plum	Prunus domestica	0	0	0	0	0	0	0	0	0	0	0.35	0	0	0	0	0	0	0
11316	Plum	Prunus domestica	0	0	0	0	0	0	0	0	0	0	0.45	0	0	0	0	0	0	0
11317	Plum	Prunus domestica	0	0	0	0	0	0	0	0	0	0	0.71	0	0	0	0	0	0	0
11318	Plum	Prunus domestica	0	0	0	0	0	0	0	0	0	0	0.34	0	0	0	0	0	0	0
53069-1	Strawberry	Fragaria x ananassa	0	0	0	0	0	0	0	0	0	0	0	0	0	0	0	0	0	0
53069-2	Strawberry	Fragaria x ananassa	0	0	0	0	0	0	0	0	0	0	0	0	0	0	0	0	0	0
53069-3	Strawberry	Fragaria x ananassa	0	0	0	0	0	0	0	0	0	0	0	0	0	0	0	0	0	0
53069-4	Strawberry	Fragaria x ananassa	0	0	0	0	0	0	0	0	0	0	0	0	0	0	0	0	0	0
53069-5	Strawberry	Fragaria x ananassa	0	0	0	0	0	0	0	0	0	0	0	0	0	0	0	0	0	0
53069-6	Strawberry	Fragaria x ananassa	0	0	0	0	0	0	0	0	0	0	0	0	0	0	0	0	0	0
53069-7	Strawberry	Fragaria x ananassa	0	0	0	0	0	0	0	0	0	0	0	0	0	0	0	0	0	0
53108-1	Strawberry	Fragaria x ananassa	0	0	0	0	0	0	0	0	0	0.01	0	0	0	0	0	0	0	0
53108-2	Strawberry	Fragaria x ananassa	0	0	0	0	0	0	0	0	0	0.03	0	0	0	0	0	0	0	0
53108-3	Strawberry	Fragaria x ananassa	0	0	0	0	0	0	0	0	0	0	0	0	0	0	0	0	0	0
53108-4	Strawberry	Fragaria x ananassa	0	0	0	0	0	0	0	0	0	0	0	0	0	0	0	0	0	0
53108-5	Strawberry	Fragaria x ananassa	0	0	0	0	0	0	0	0	0	0	0	0	0	0	0	0	0	0
53108-6	Strawberry	Fragaria x ananassa	0	0	0	0	0	0	0	0	0	0	0	0	0	0	0	0	0	0
53108-7	Strawberry	Fragaria x ananassa	0	0	0	0	0	0	0	0	0	0	0	0	0	0	0	0	0	0
53123-1	Strawberry	Fragaria x ananassa	0	0	0	0	0	0	0	0	0	0	0	0	0	0	0	0	0	0
53123-2	Strawberry	Fragaria x ananassa	0	0	0	0	0	0	0	0	0	0	0	0	0	0	0	0	0	0
53123-3	Strawberry	Fragaria x ananassa	0	0	0	0	0	0	0	0	0	0	0	0	0	0	0	0	0	0
53123-4	Strawberry	Fragaria x ananassa	0	0	0	0	0	0	0	0	0	0	0	0	0	0	0	0	0	0
53123-5	Strawberry	Fragaria x ananassa	0	0	0	0	0	0	0	0	0	0	0	0	0	0	0	0	0	0
53123-6	Strawberry	Fragaria x ananassa	0	0	0	0	0	0	0	0	0	0	0	0	0	0	0	0	0	0
29352	Sweet Cherry	Prunus avium	0	0	0	0	0	0	0	0	0	0	0	0	0	0	0	0	0	0
29353	Sweet Cherry	Prunus avium	0	0	0	0	0	0	0	0	0	0	0	0	0	0	0	0	0	0
29354	Sweet Cherry	Prunus avium	0	0	0	0	0	0	0	0	0	0	0	0	0	0	0	0	0	0
29355	Sweet Cherry	Prunus avium	0	0	0	0	0	0	0	0	0	0	0	0	0	0	0	0	0	0
29356	Sweet Cherry	Prunus avium	0	0	0	0	0	1	0	0	0	0	0	0	0	0	0	0	0	0
29357	Sweet Cherry	Prunus avium	0	0	0	0	0	0.99	0	0	0	0	0	0	0	0	0	0	0	0
29358	Sweet Cherry	Prunus avium	0	0	0	0	0	0.74	0	0	0	0	0	0.98	0	0	0	0	0	0
29359	Sweet Cherry	Prunus avium	0	0	0	0	0	0.49	0	0	0	0	0	0.93	0	0	0	0.03	0	0
29361	Sweet Cherry	Prunus avium	0	0	0	0	0	0.93	0	0	0	0	0	0	0	0	0	0	0	0
29362	Sweet Cherry	Prunus avium	0	0	0	0	0	0.91	0	0	0	0	0	0	0	0	0	0	0	0
29363	Sweet Cherry	Prunus avium	0	0	0	0	0	0.96	0	0	0	0	0	0	0	0	0	0.14	0	0
29364	Sweet Cherry	Prunus avium	0	0	0	0	0	0.95	0	0	0	0	0	0.97	0	0	0	0	0	0
29371	Sweet Cherry	Prunus avium	0	0	0	0	0	0.58	0	0	0	0	0	0	0	0	0	0	0	0
29372	Sweet Cherry	Prunus avium	0	0	0	0	0	0.93	0	0	0	0	0	0.98	0	0	0	0	0	0
29373	Sweet Cherry	Prunus avium	0	0	0	0	0	0.74	0	0	0	0	0	0	0	0	0	0	0	0
29374	Sweet Cherry	Prunus avium	0	0	0	0	0	0.75	0	0	0	0	0	0	0	0	0	0.55	0	0
